# Supplementary material for: microRNA from brush biopsy to characterize oral squamous cell carcinoma epithelium
Source: PubMed Central journal article supplement (PMC5275769; doi:10.1002/cam4.951), 2016-12-18

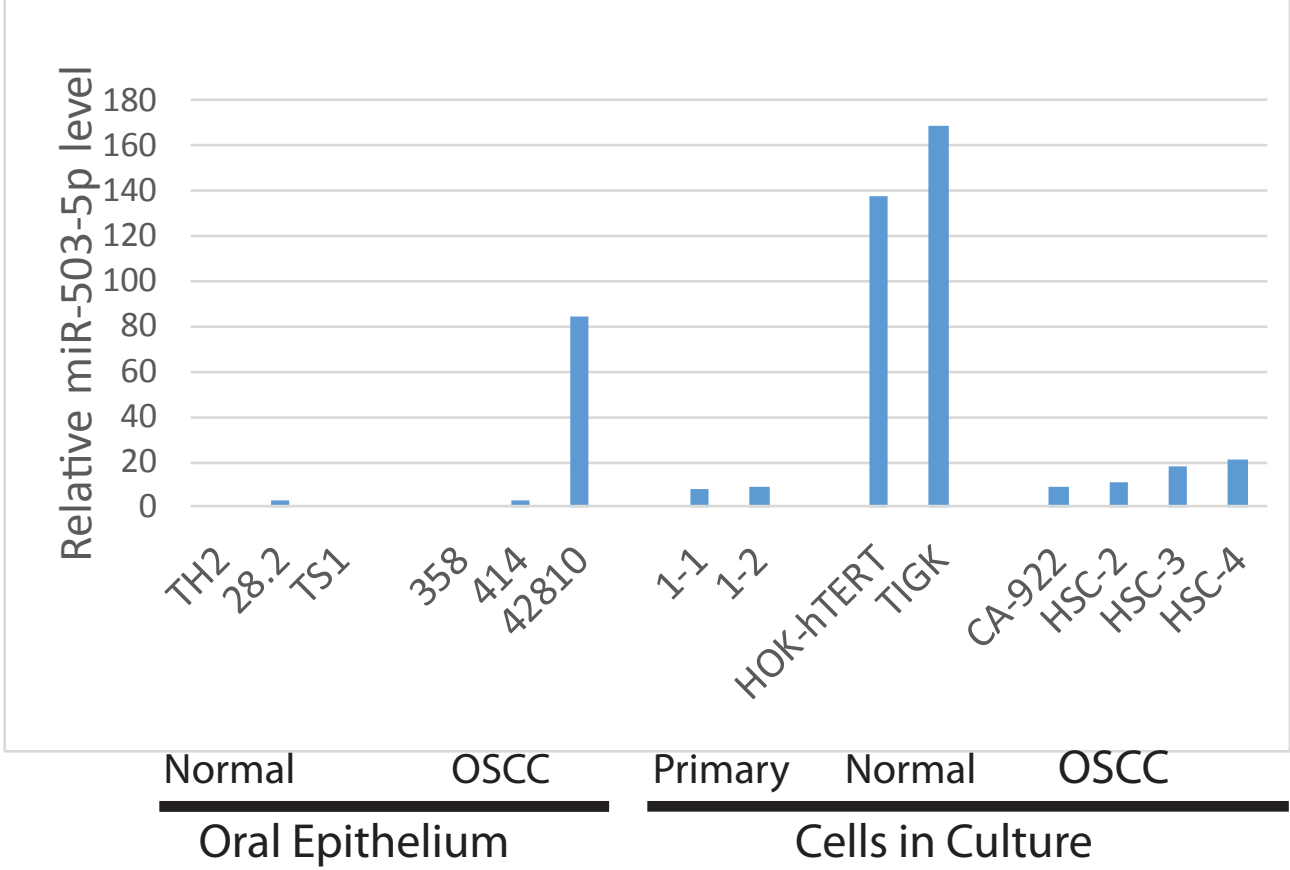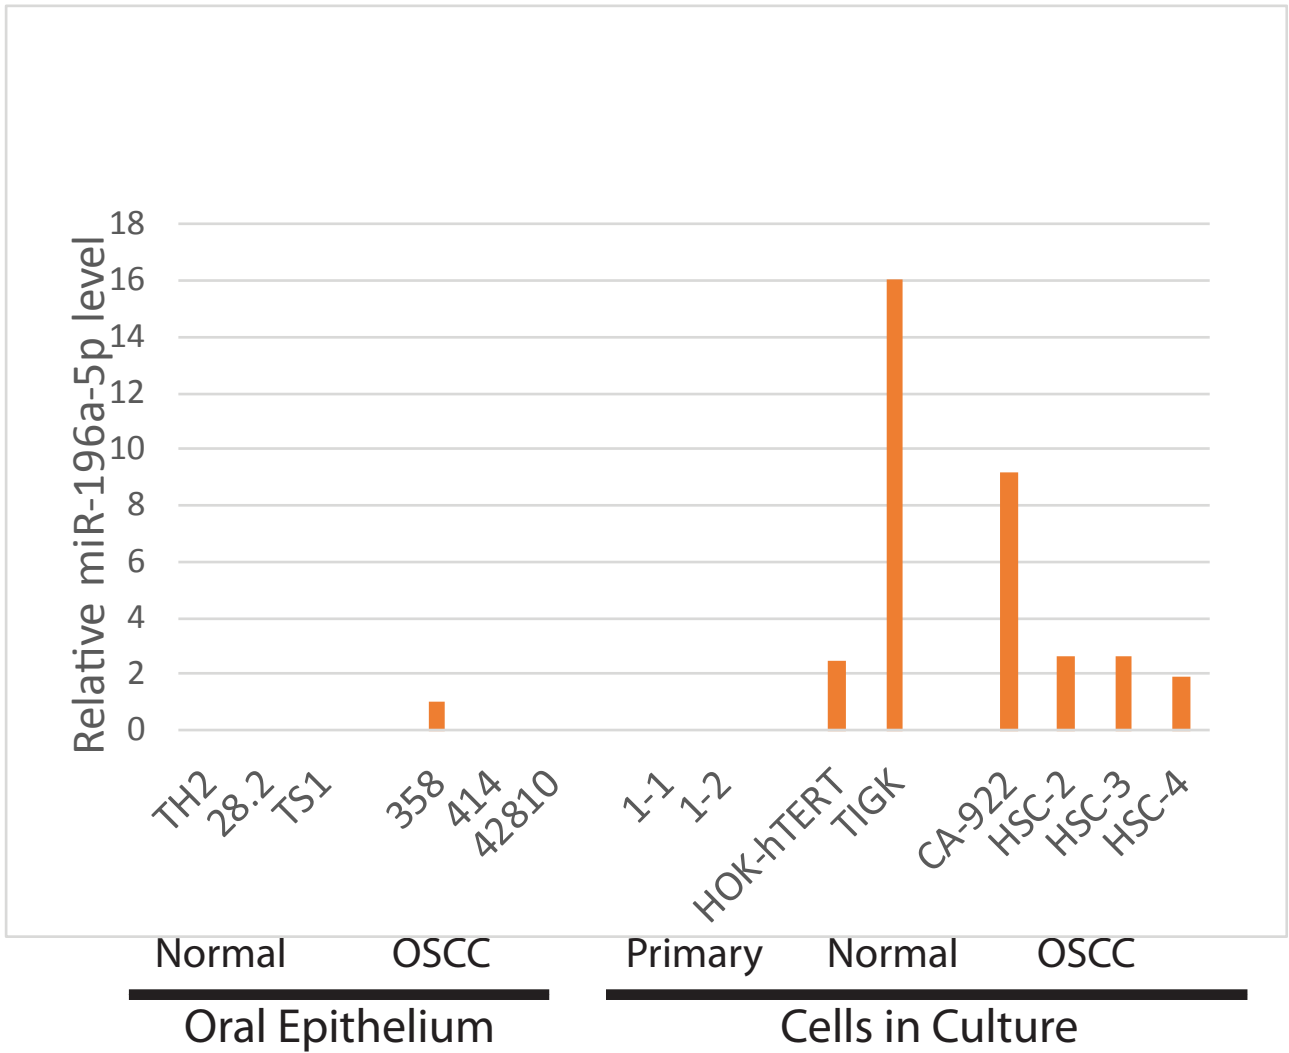

Supplement: CAM4-6-67-s001.pdf [file CAM4-6-67-s001.pdf]
